# Supplementary material for: Stellate Cells, Hepatocytes, and Endothelial Cells Imprint the Kupffer Cell Identity on Monocytes Colonizing the Liver Macrophage Niche
Source: PubMed Central journal article supplement — Immunity. 2019 Oct 15;51(4):638–654.e9. doi: 10.1016/j.immuni.2019.08.017 (PMC6876284; doi:10.1016/j.immuni.2019.08.017), 2019-10-15
Supplement: mmc1.pdf [file mmc1.pdf]

**Immunity, Volume 51**

**Supplemental Information**

**Stellate Cells, Hepatocytes, and Endothelial Cells**

**Imprint the Kupffer Cell Identity on Monocytes**

**Colonizing the Liver Macrophage Niche**

**Johnny Bonnardel, Wouter T'Jonck, Djoere Gaublonne, Robin Browaeys, Charlotte L. Scott, Liesbet Martens, Bavo Vanneste, Sofie De Prijck, Sergei A. Nedospasov, Anna Kremer, Evelien Van Hamme, Peter Borghgraef, Wendy Toussaint, Pieter De Bleser, Inge Mannaerts, Alain Beschin, Leo A. van Grunsven, Bart N. Lambrecht, Tom Taghon, Saskia Lippens, Dirk Elewaut, Yvan Saeys, and Martin Guilliams**

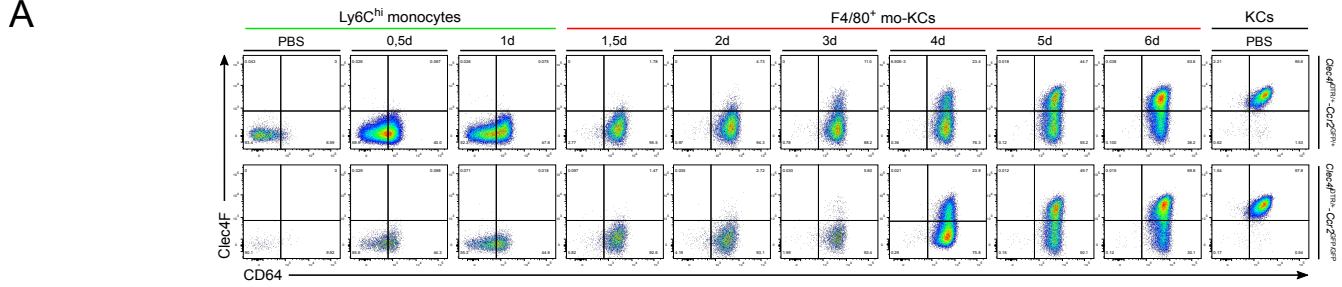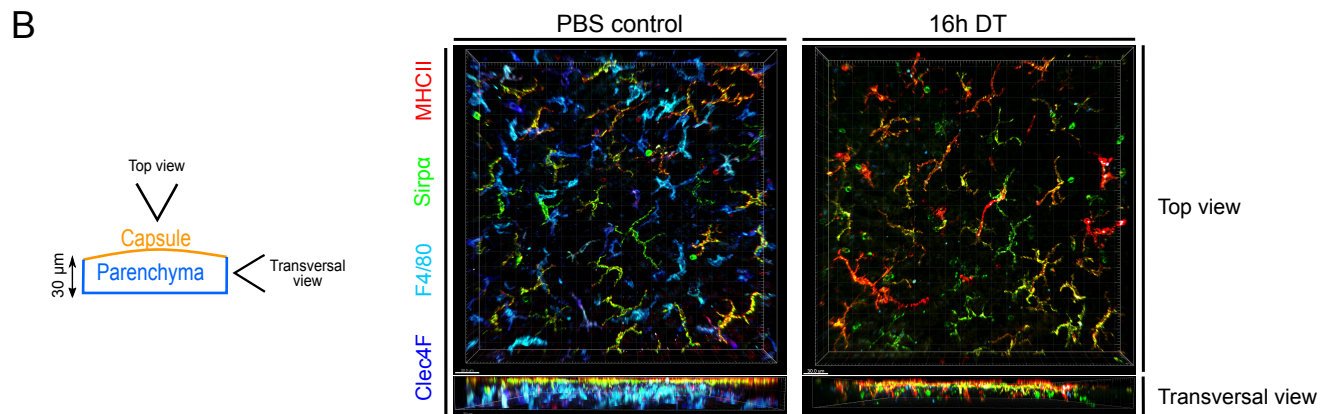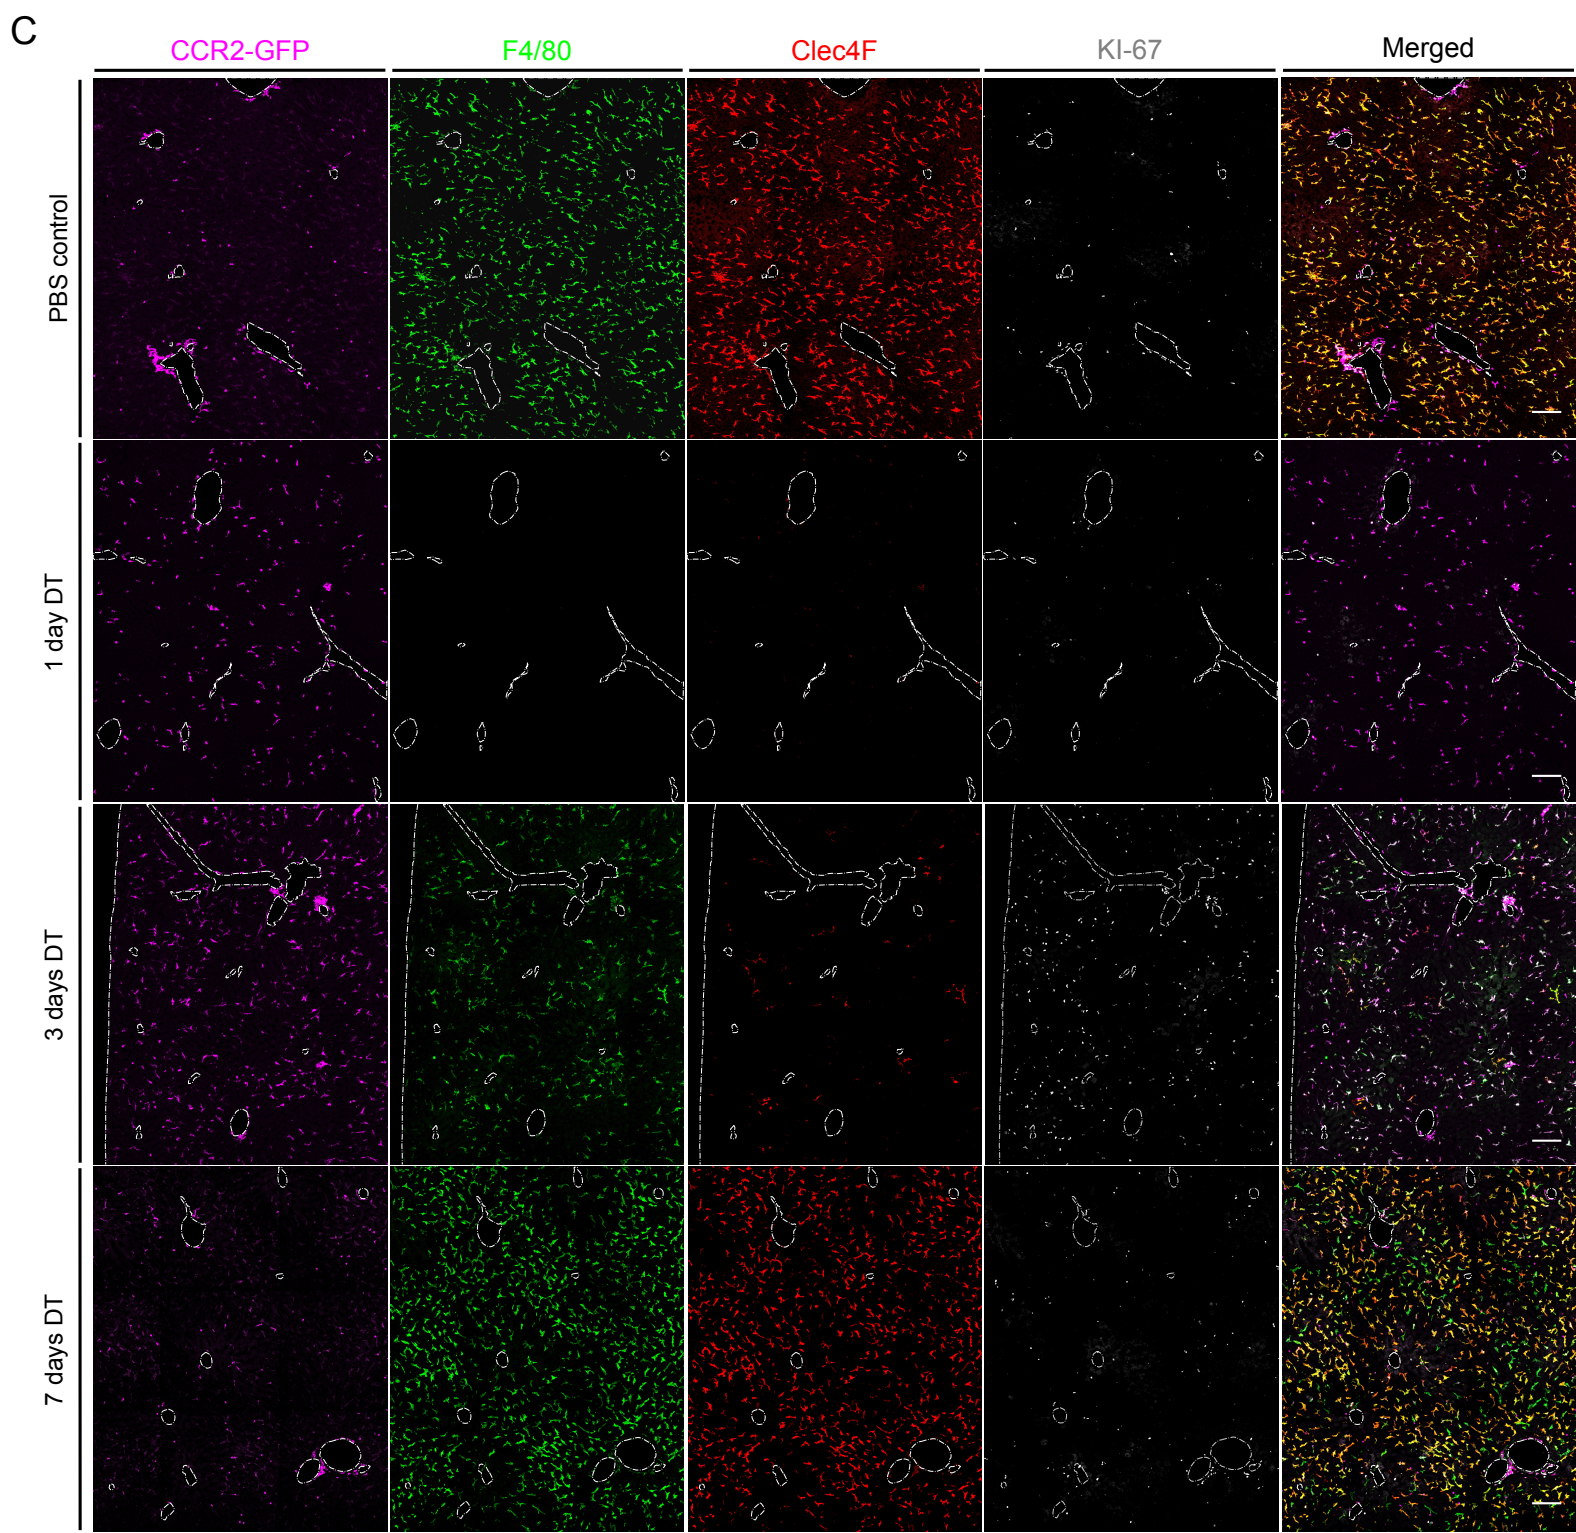

**Figure S1, Related to figure 1. Differentiation and proliferation of mo-KCs.**

(A) CD64 and Clec4F expression after DT injection in (top row) *Clec4f*<sup>DTR/+</sup>-*Ccr2*<sup>GFP/+</sup> mice or (bottom row) *Clec4f*<sup>DTR/+</sup>-*Ccr2*<sup>GFP/GFP</sup> mice. Flow cytometry-plots are pre-gated on live CD45<sup>+</sup>CD11b<sup>+</sup>Lyve-1<sup>-</sup>SiglecF<sup>-</sup>Ly6G<sup>-</sup> single cells. Ly6C<sup>hi</sup> monocytes, mo-KCs and em-KCs are gated as shown in Figure 1A. Data are representative of 2 to 3 experiments.

(B) MIP of *Clec4f*<sup>DTR/+</sup> mouse liver sections stained for Clec4F (blue), F4/80 (cyan), *Sirpa* (green) and MHCII (red) in PBS control mice or 16h after DT injection. Two different views are depicted showing that capsule liver macrophages (*Sirpa*<sup>hi</sup> MHCII<sup>+</sup> F4/80<sup>low</sup> Clec4F<sup>-</sup>) were not depleted following DT injection, on contrary to KCs (*Sirpa*<sup>low</sup> MHCII<sup>low</sup> F4/80<sup>hi</sup> Clec4F<sup>hi</sup>). Data are representative of 2 experiments. Scale bar = 30  $\mu$ m.

(C) MIP of a confocal composite dataset (3 by 4) of *Clec4f*<sup>DTR/+</sup>-*Ccr2*<sup>GFP/+</sup> mouse liver sections stained for GFP (magenta) F4/80 (green), Clec4F (red) and KI-67 (grey) in PBS control mice or 1, 3 and 7 days after DT administration. Data are representative of 2 experiments. Scale bar = 100  $\mu$ m.

A

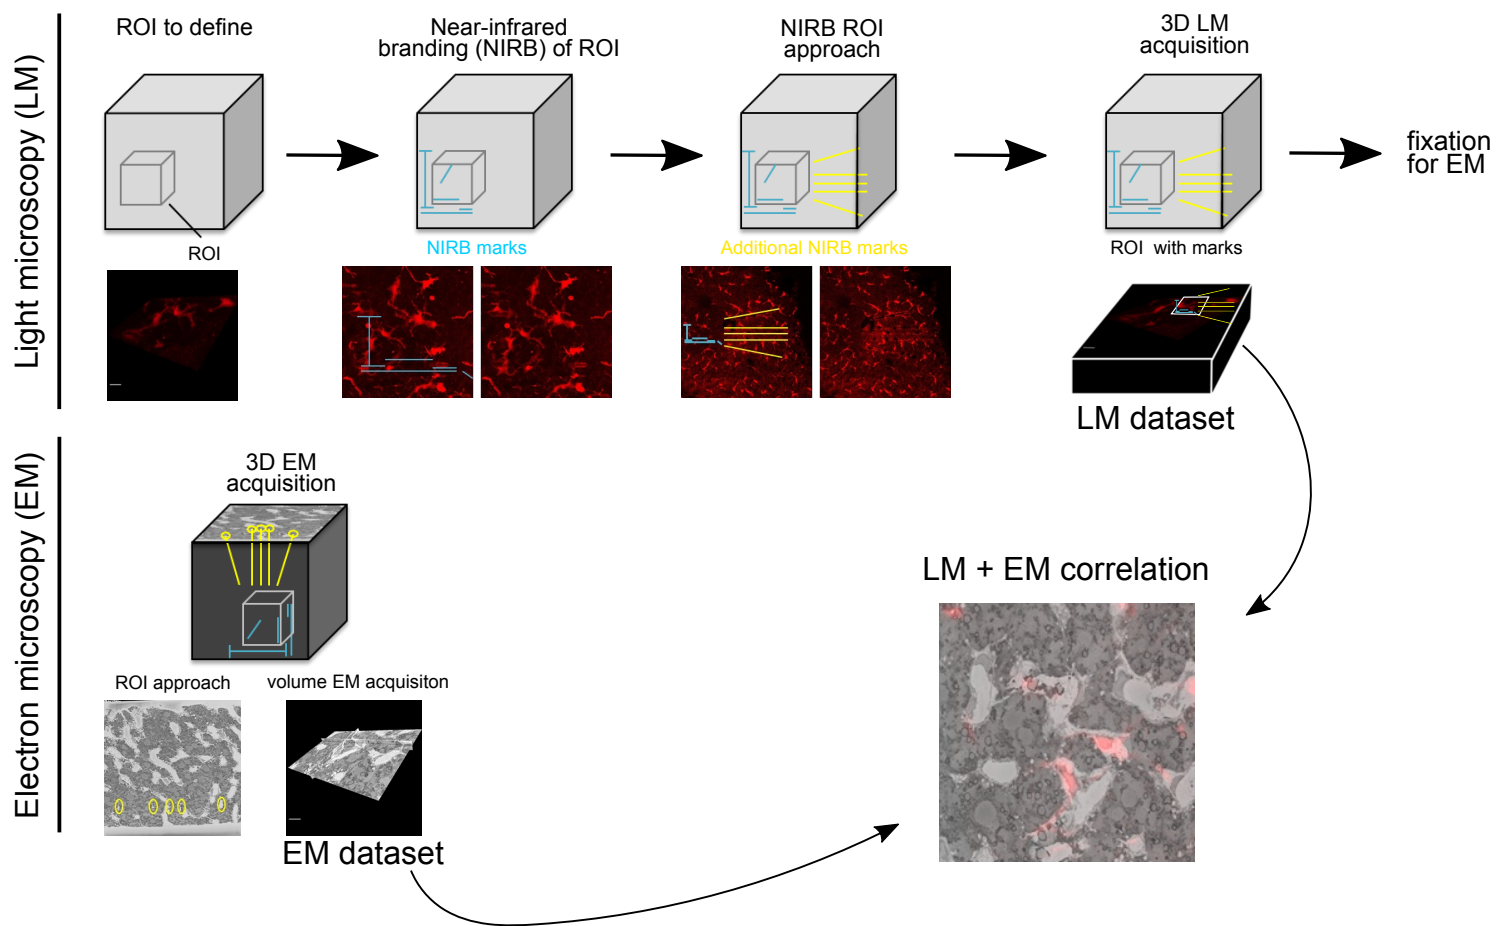

B

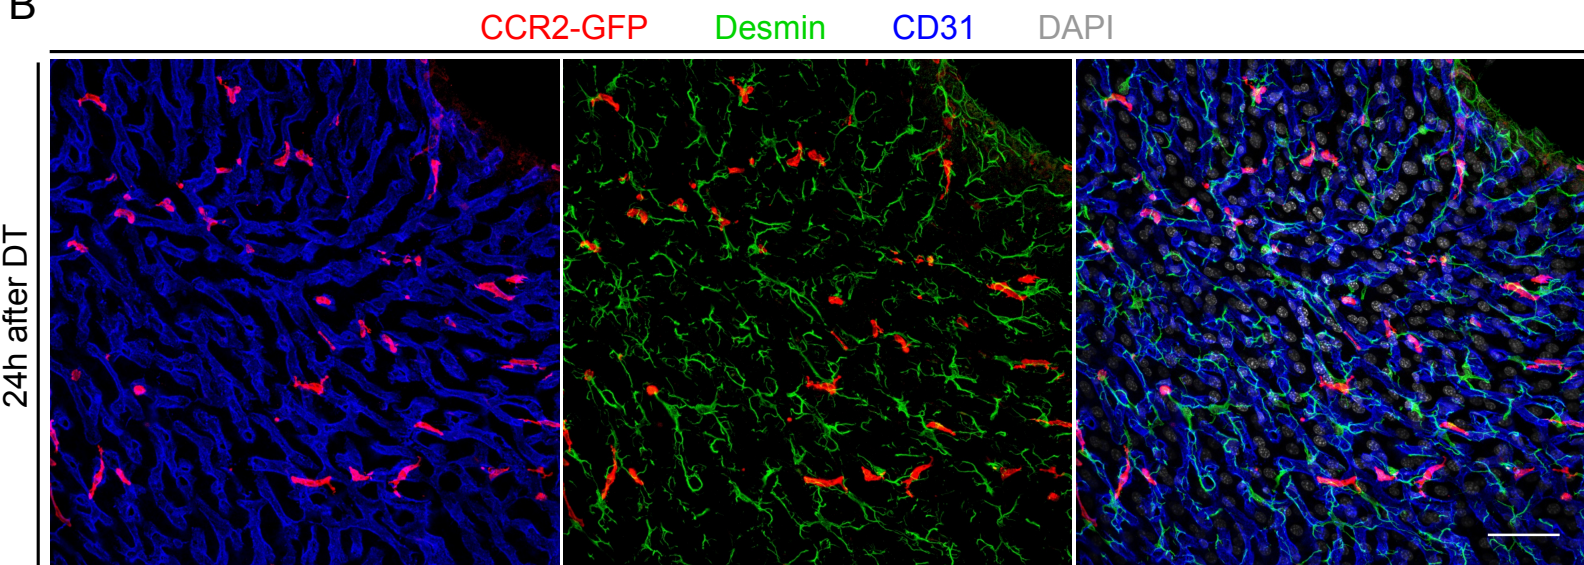

C

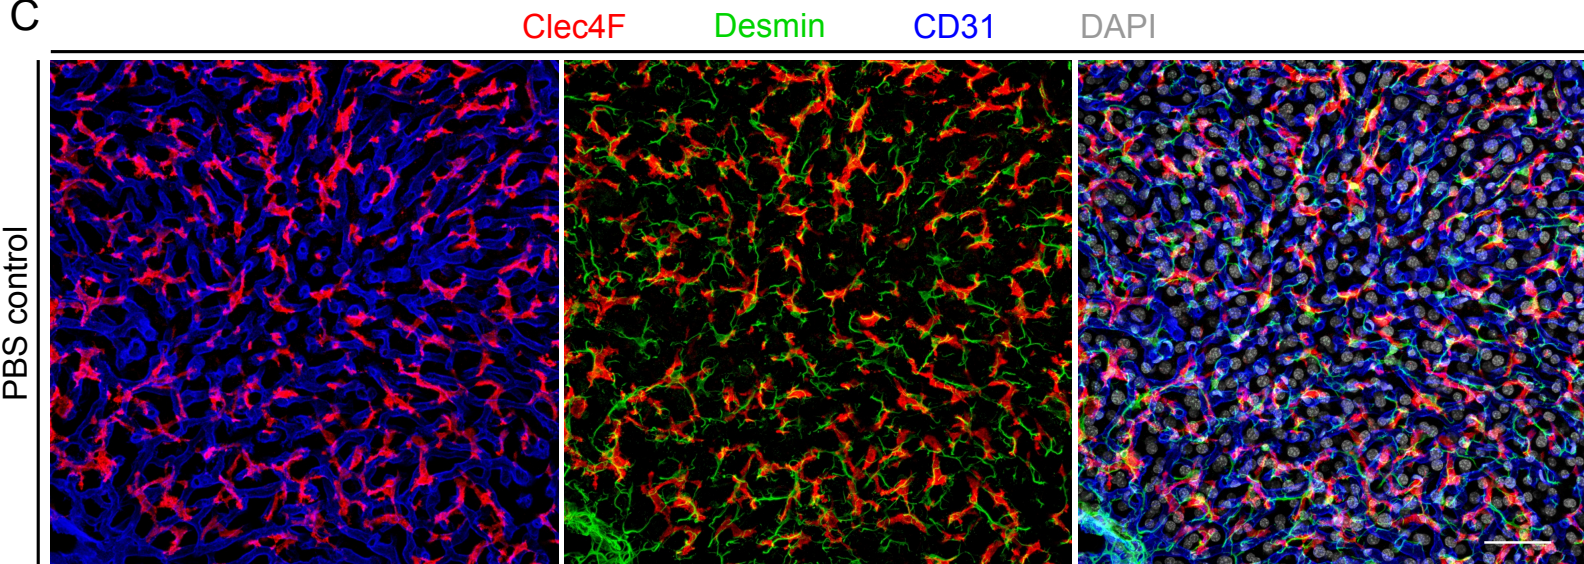

**Figure S2, Related to figure 3. Correlative light-electron microscopy and interaction between HSC and monocytes or KCs.**

(A) Schematic representation of the protocol used to performed the correlative light-electron microscopy.

(B) MIP of *Clec4f*<sup>DTR/+</sup>-*Ccr2*<sup>GFP/+</sup> mouse liver sections stained for GFP (red), Desmin (green), CD31 (blue) and DAPI (grey) 24h after DT administration. Data are representative of 3 experiments. Scale bar = 50µm.

(C) MIP of *Clec4f*<sup>DTR/+</sup> mouse liver sections stained for Clec4F (red), Desmin (green), CD31 (blue) and DAPI (grey) in PBS control. Data are representative of 5 experiments. Scale bar = 50µm.

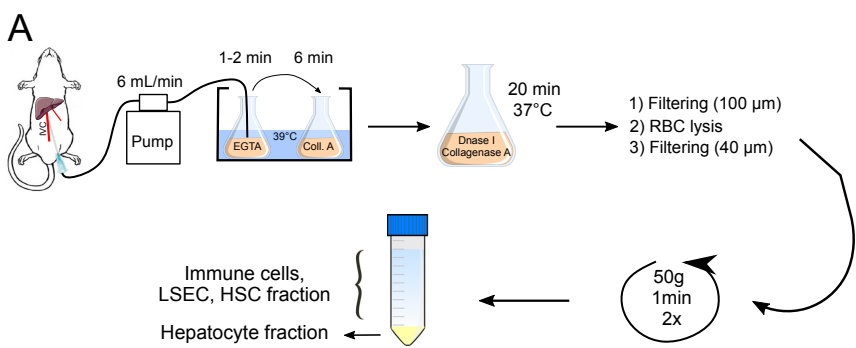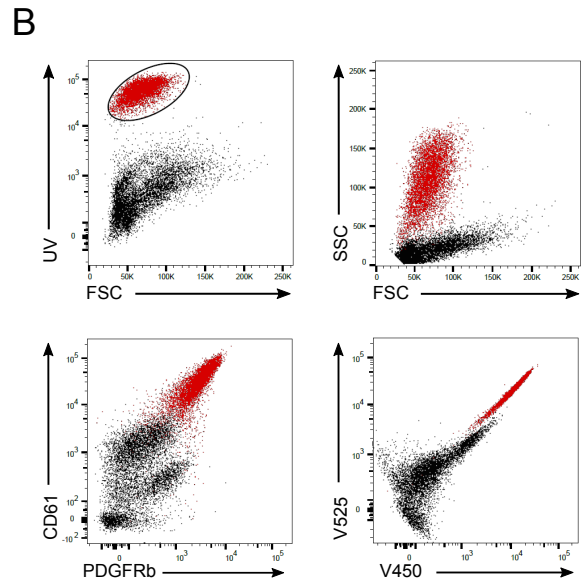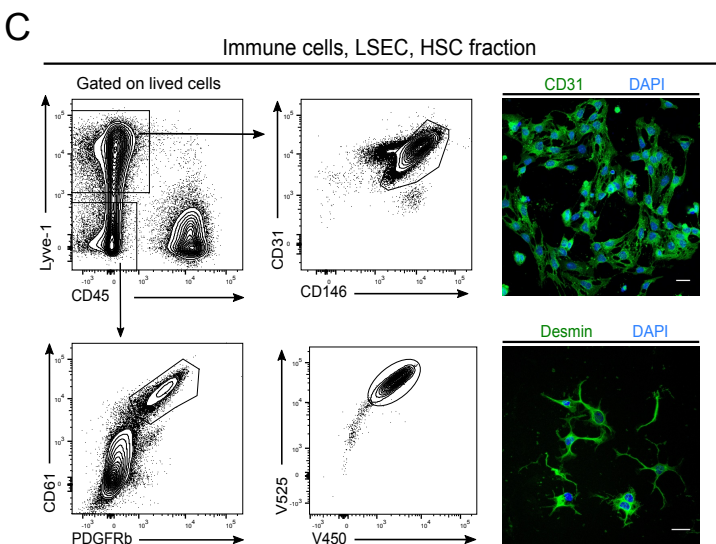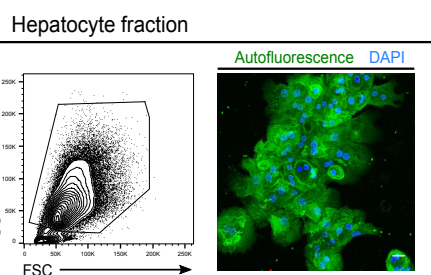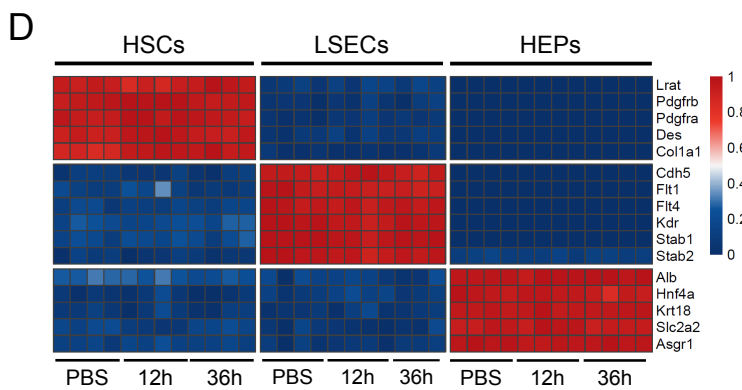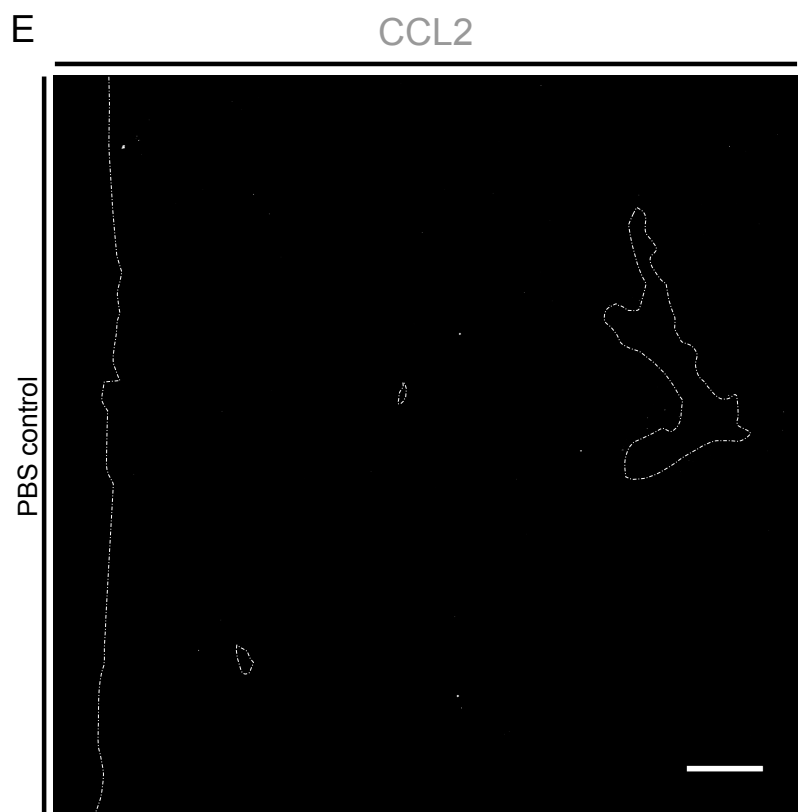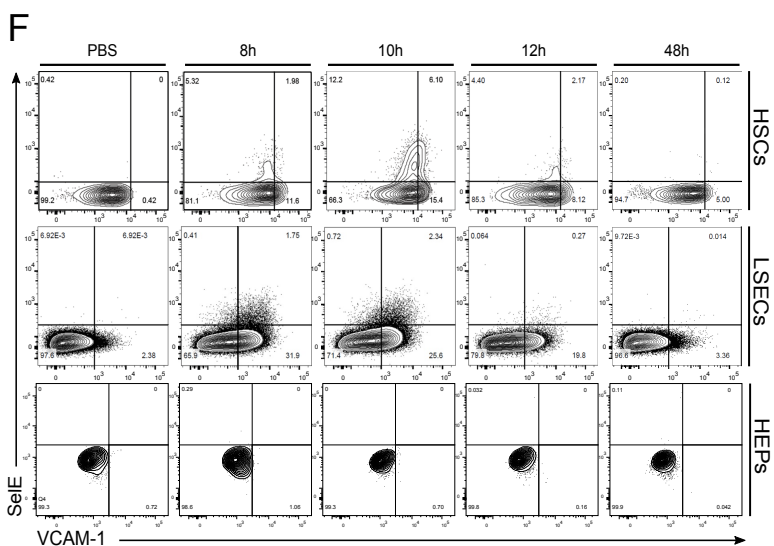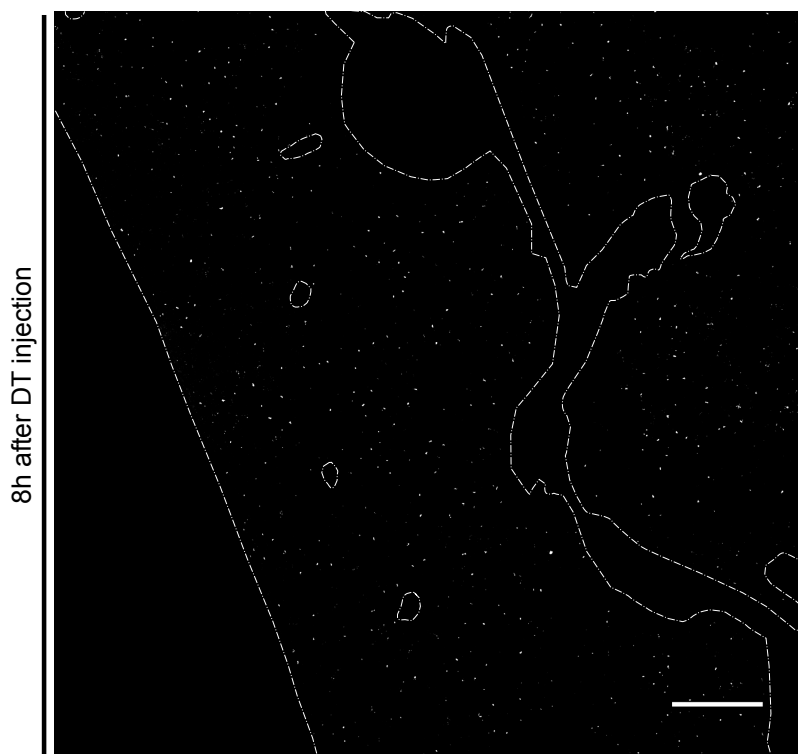

**Figure S3, Related to figure 4. Isolation protocol and gating strategy of HSCs, LSECs and hepatocytes.**

(A) Schematic representation of the HSC, LSEC and hepatocyte isolation procedure.

(B) Flow cytometry-plots shows the endogenous autofluorescence of HSCs (red) in the UV channel (395nm channel and 450/50 band-pass filter), V450 and V525 channel as well as their expression of CD61 and PDGFR $\beta$  and their SSC and HSC characteristics. Cells were pre-gated on live cells.

(C) Flow cytometry-plots shows the gating strategy used to isolate HSCs (CD45<sup>-</sup>Lyve-1<sup>-</sup>CD61<sup>+</sup>PDGFR $\beta$ <sup>+</sup>Autofluorescence<sup>+</sup> in the V525 and V450 channel) LSECs (CD45<sup>-</sup>Lyve-1<sup>+</sup>CD31<sup>+</sup>CD146<sup>+</sup>) and hepatocytes (CD45<sup>-</sup>Lyve-1<sup>-</sup>SSC<sup>hi</sup>FSC<sup>hi</sup>). Cells were sorted, stained for DAPI and CD31 (LSECs), Desmin (HSCs) or autofluorescence (hepatocytes) and imaged by confocal microscopy in order to confirmed their identity by morphology.

(D) Heatmap shows the expression by RNA-seq of specific genes of HSCs (*Lrat*, *Pdgfrb*, *Pdgfra*, *Des*, *Col1a1*), LSECs (*Cdh5*, *Flt1*, *Flt4*, *Kdr*, *Stab1*, *Stab2*) and Hepatocytes (*Alb*, *Hnf4a*, *Krt18*, *Asgr1*, *Slc2a2*) on the different sorted cell populations.

(E) MIP of a confocal dataset of KC<sup>DTR/+</sup>-CCR2<sup>GFP/+</sup> mouse liver sections stained for CCL2 (Grey) 8h after DT or PBS injection.

(F) Expression of VCAM-1 and Selectin E on HSCs, LSECs and Hepatocytes after DT injection. FACS-plots are pre-gated on live CD45<sup>-</sup> and further gated on Lyve-1<sup>+</sup> (LSECs), UV<sup>+</sup> autofluorescence<sup>+</sup> (HSCs), SSC<sup>hi</sup>FSC<sup>hi</sup> (HEPs). Data are representative of 2-4 experiments.

**A** Genes differentially expressed both by HSCs and LSECs during depletion

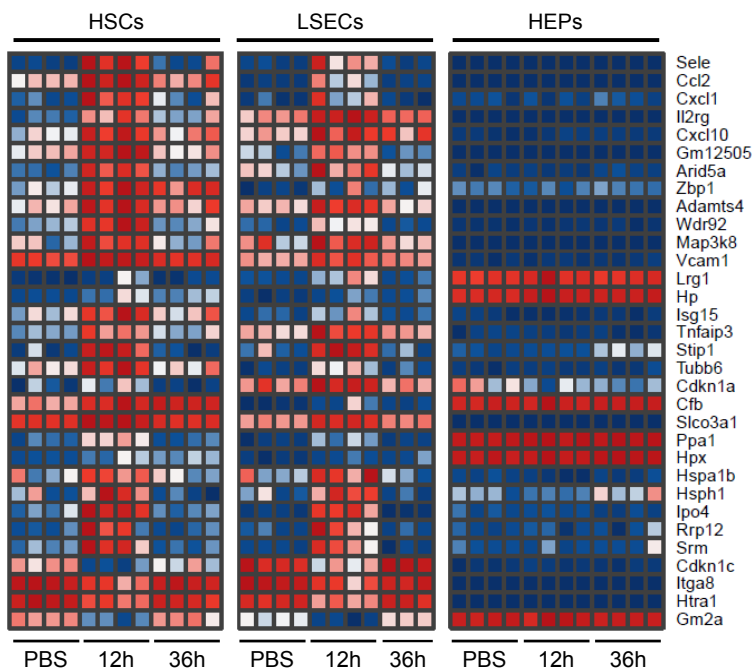

Genes specifically differentially-expressed by LSECs during depletion

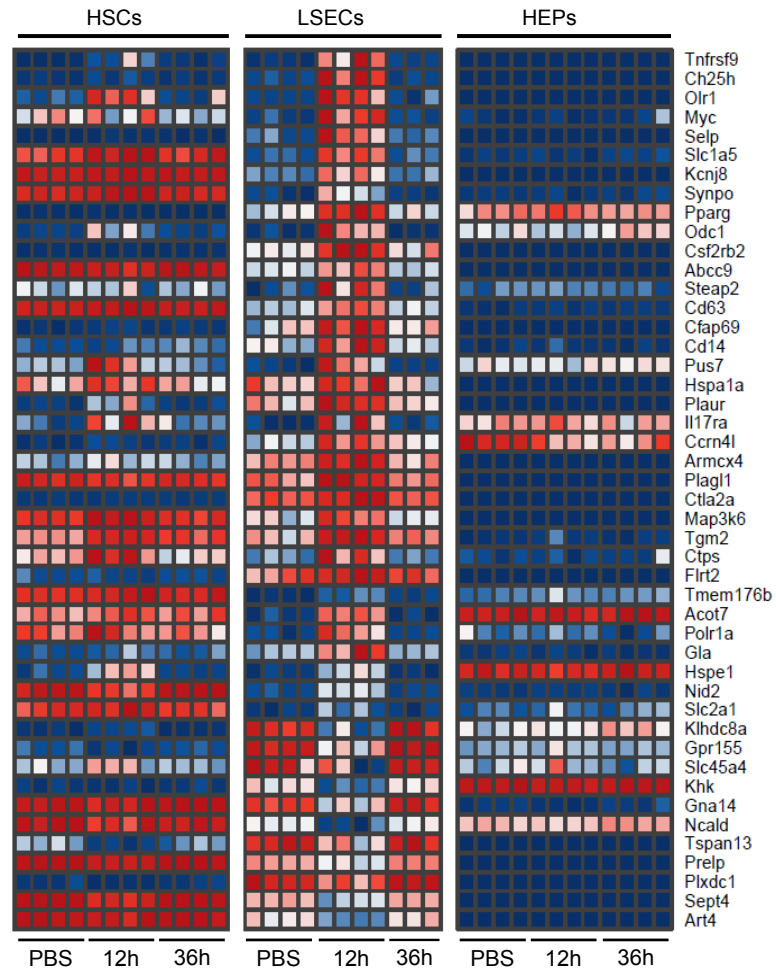

Genes specifically differentially-expressed by HSCs during depletion

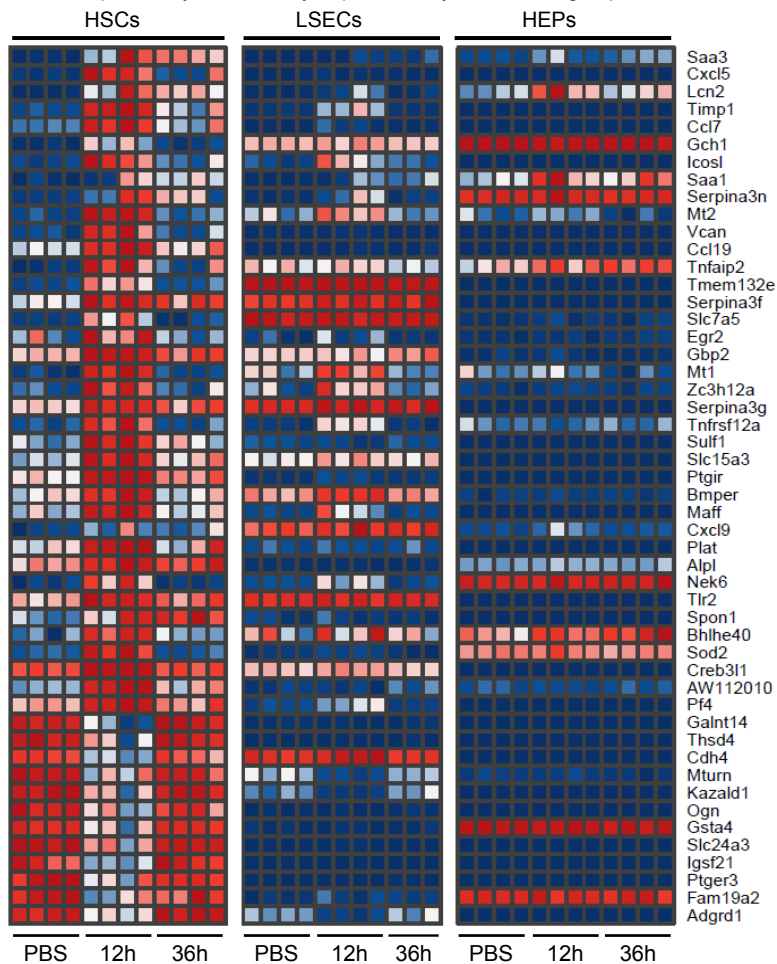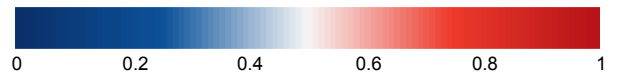

**B**

Ingenuity Pathways Analysis (IPA)

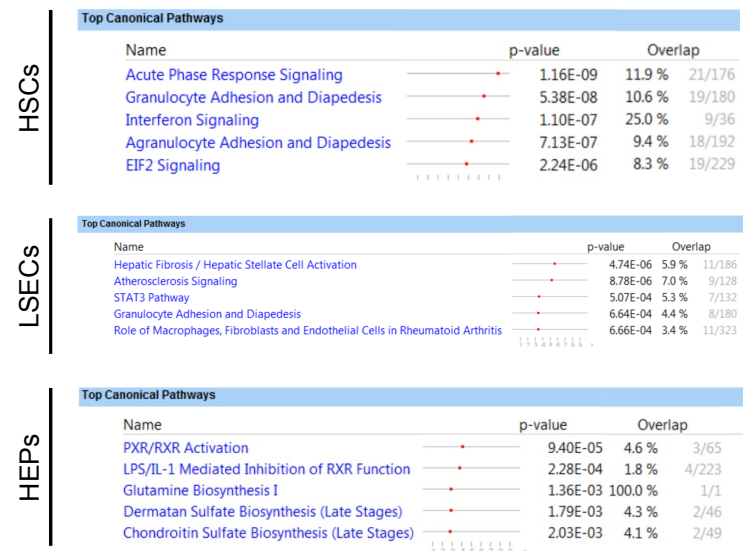

**C**

DE genes for granulocyte and agranulocyte adhesion and diapedesis

**HSCs**

Up = *Ccl2, Ccl7, Ccl19, Cxcl1, Cxcl5, Cxcl9, Cxcl10, Cxcl16, Myl9, Hspb1, Icam1, Pf4, Sdc4, Sele, Vcam1*

Down = *Mmp2, Mmp11, Mmp17, Cxcl12, Sdc2*

**LSECs**

Up = *Ccl2, Cxcl1, Cxcl10, Il1a, Icam1, Vcam1, Sele, Selp*

Down = none

Genes specifically differentially-expressed by HEPs during depletion

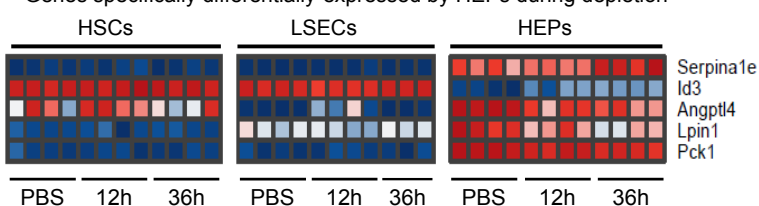



**Figure S4, Related to figure 4. Differentially-expressed genes of HSCs, LSECs and hepatocytes 12h and 36h after KC-depletion.**

(A) Heatmap shows the 31 DE genes (27 upregulated, 4 downregulated) in common between HSCs and LSECs, the top 50 of genes (38 upregulated, 12 downregulated) only DE in HSCs, the 46 genes (39 upregulated, 11 downregulated) only DE in LSECs and the 5 genes (2 upregulated, 3 downregulated) only DE in hepatocytes after KC depletion with a logFC > 1.5 or < -1.5.

(B) Ingenuity Pathways Analysis of the DE genes of each cell population.

(C) List of genes involved in “granulocyte and agranulocyte adhesion and diapedesis” upregulated by HSCs or LSECs after KC depletion according to ingenuity pathway analysis.

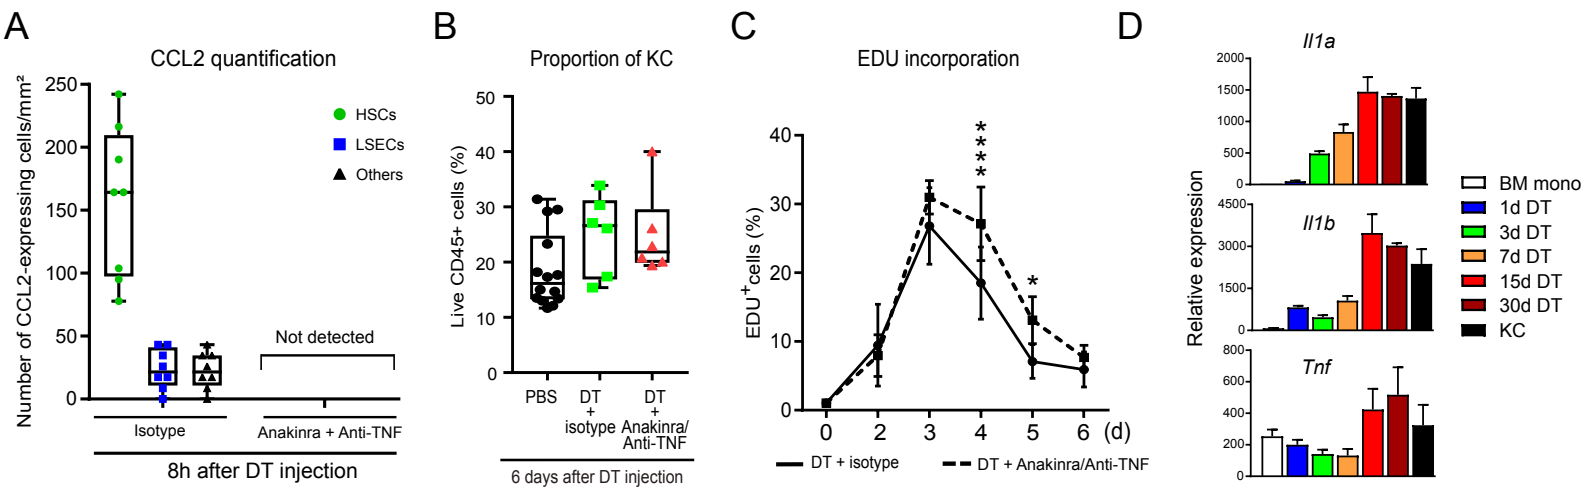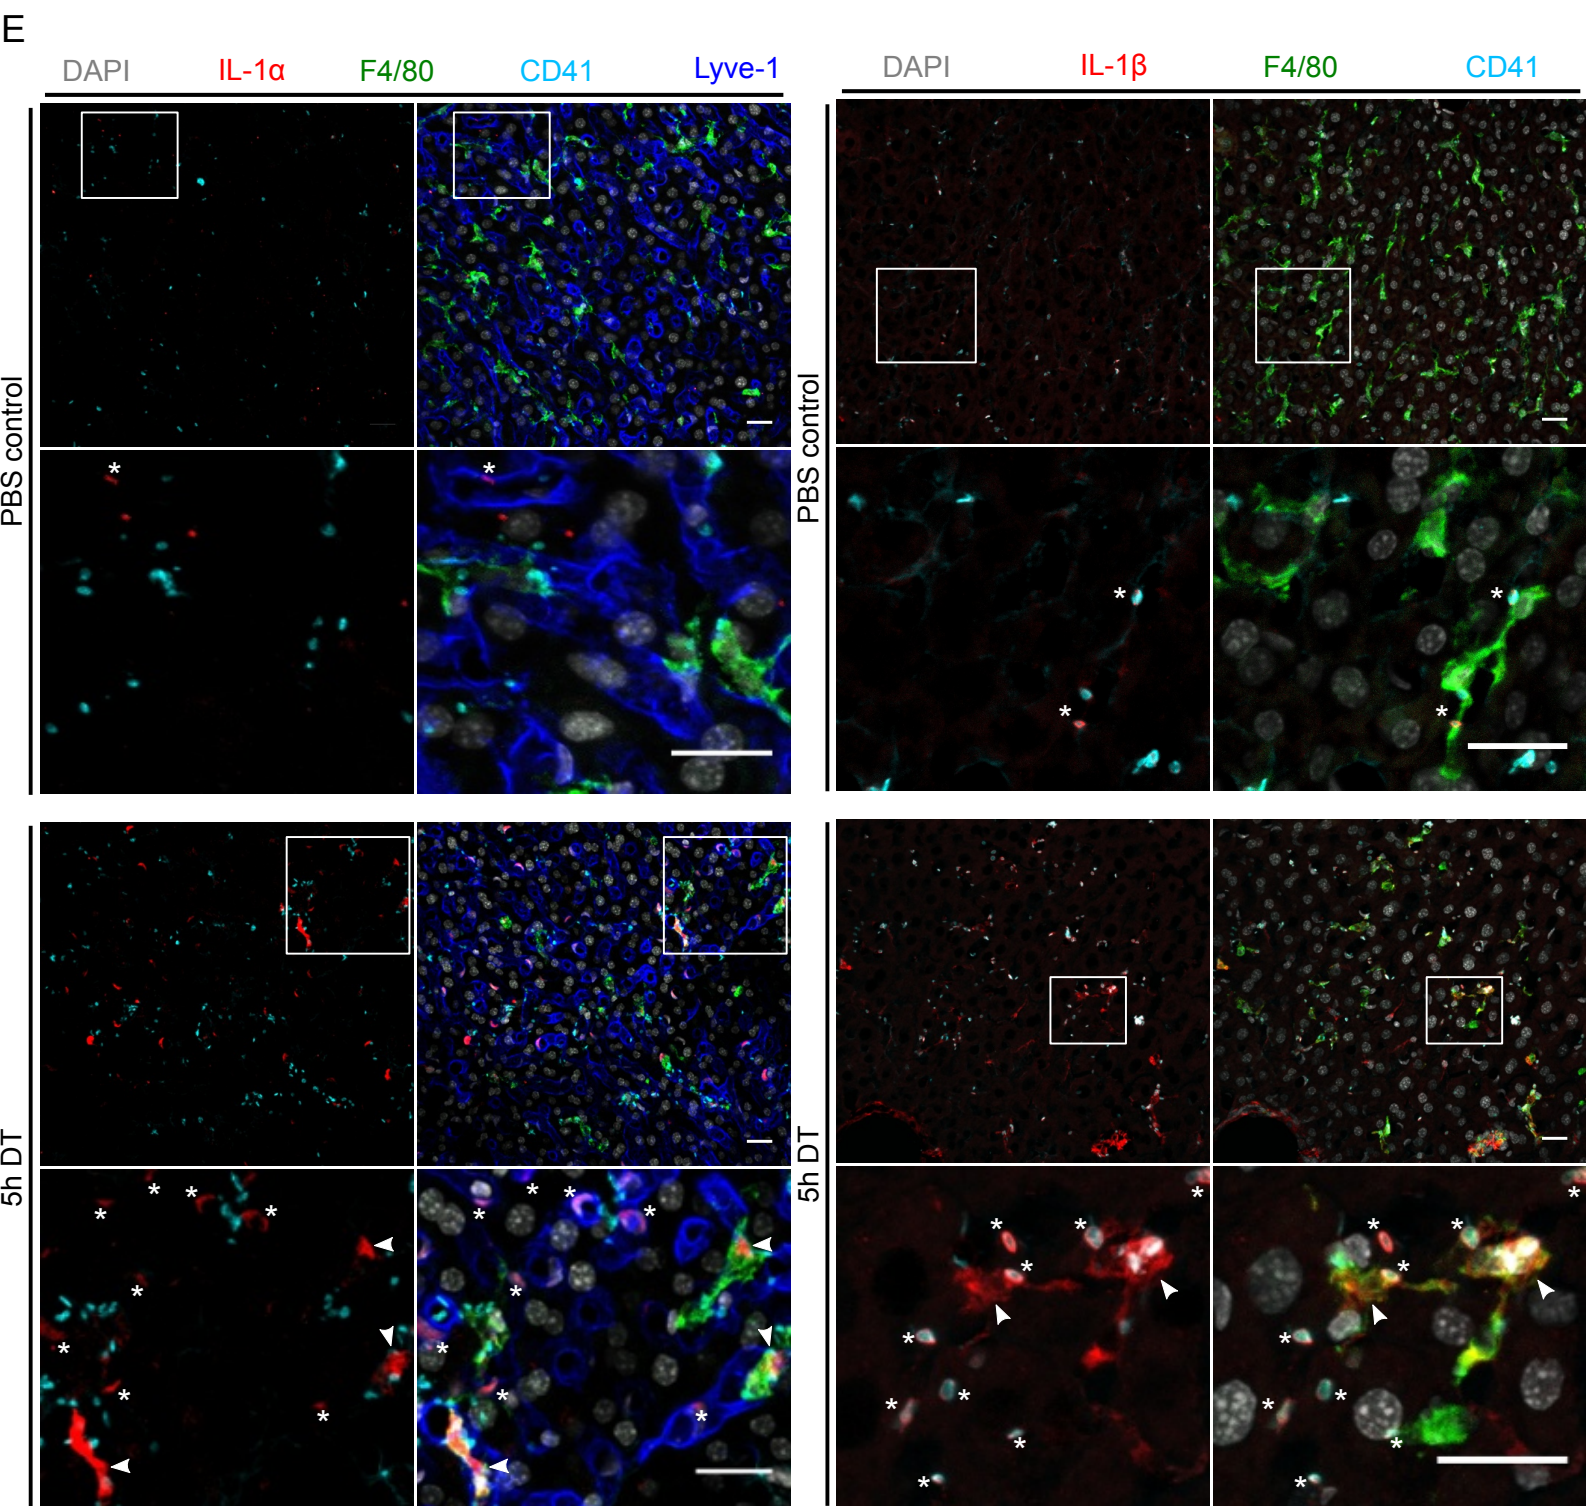

**Figure S5, Related to figure 5. KCs, LSECs and platelets as a potential source of IL-1 following KCs depletion.**

(A) Quantification of the number of CCL2<sup>+</sup> cells/mm<sup>2</sup> 8h after DT injection in mice injected with either isotype antibodies or a combination of anti-TNF antibodies and Anakinra. Dots represent individual pictures. Results were normalized per mm<sup>2</sup> of tissue. Data are pooled from 2 experiments. n= 4 per condition.

(B) Proportion of KCs in the liver of *Clec4f*<sup>DTR/+</sup>-*Ccr2*<sup>GFP/+</sup> mice represented as a percentage of live CD45<sup>+</sup> cells in PBS control (black dots), or 6 days after DT administration together with isotype (green) or anti-TNF + Anakinra (red). Data are pooled from 2 to 3 experiments. n= 6 (DT + isotype; DT + Anakinra/Anti-TNF) and 14 mice (PBS).

(C) Percentage of EdU<sup>+</sup> cells in mo-KC population at the indicated time-points (days) in (solid line) *Clec4f*<sup>DTR/+</sup> injected with DT and isotype antibodies or (dash line) *Clec4f*<sup>DTR/+</sup> injected with DT, Anakinra and anti-TNF antibodies. Mo-KCs were pre-gated on live CD45<sup>+</sup>CD11b<sup>+</sup>F4/80<sup>+</sup>Ly6C<sup>-</sup>Lyve-1<sup>-</sup>SiglecF<sup>-</sup>Ly6G<sup>-</sup> cells. Data are pooled from 2-3 experiments. n= 5 (0,5d); 6 (PBS, 1d, 1,5d, 2d, 5d, 6d) and 8 mice (3d, 4d). Two-way ANOVA with Tukey post-test. \*p<0.05; \*\*\*p<0.001; \*\*\*\*p<0.0001 .

(D) Relative micro-array expression of *Il1a*, *Il1b* and *Tnf* in BM monocytes, KC or Mo-KCs at the indicated time points (days) following KC depletion.

(E) MIP of KC<sup>DTR/+</sup> mouse liver sections stained for DAPI (grey), F4/80 (green), CD41 (cyan), Lyve-1 (blue) and IL-1 $\alpha$  (left; red) or IL-1 $\beta$  (right; red) in PBS control mice or 5h after DT injection. For each condition a zoomed picture of a selected region is shown. 5h after depletion IL-1 $\alpha$  showed an upregulation in KCs (arrowheads) and LSECs (asterisks) whereas IL-1 $\beta$  was overexpressed by both KCs (arrowheads) and platelets (asterisks). Data are representative of 2 experiments. Scale bar = 20  $\mu$ m.

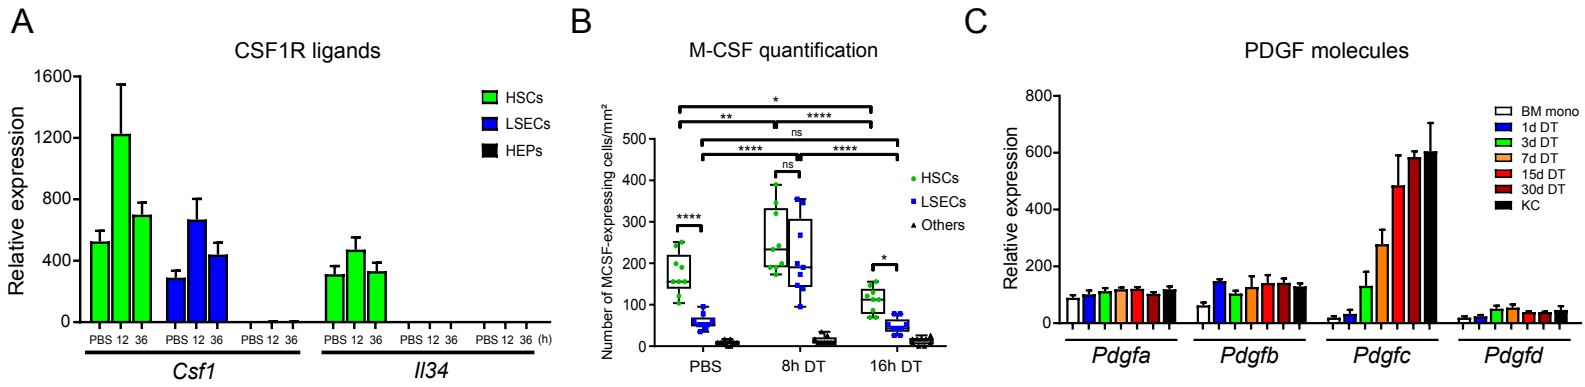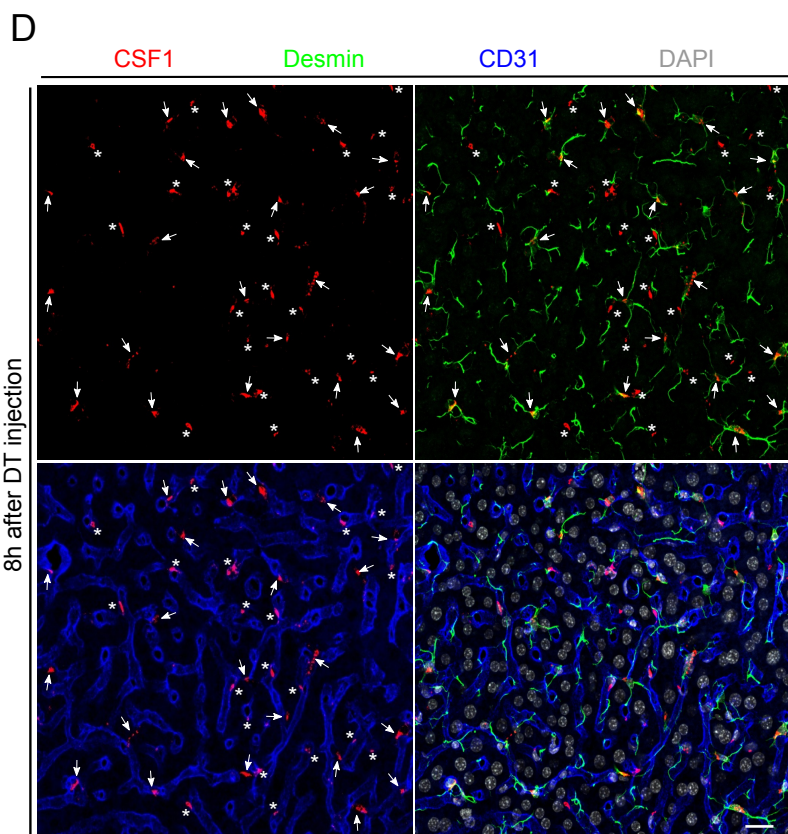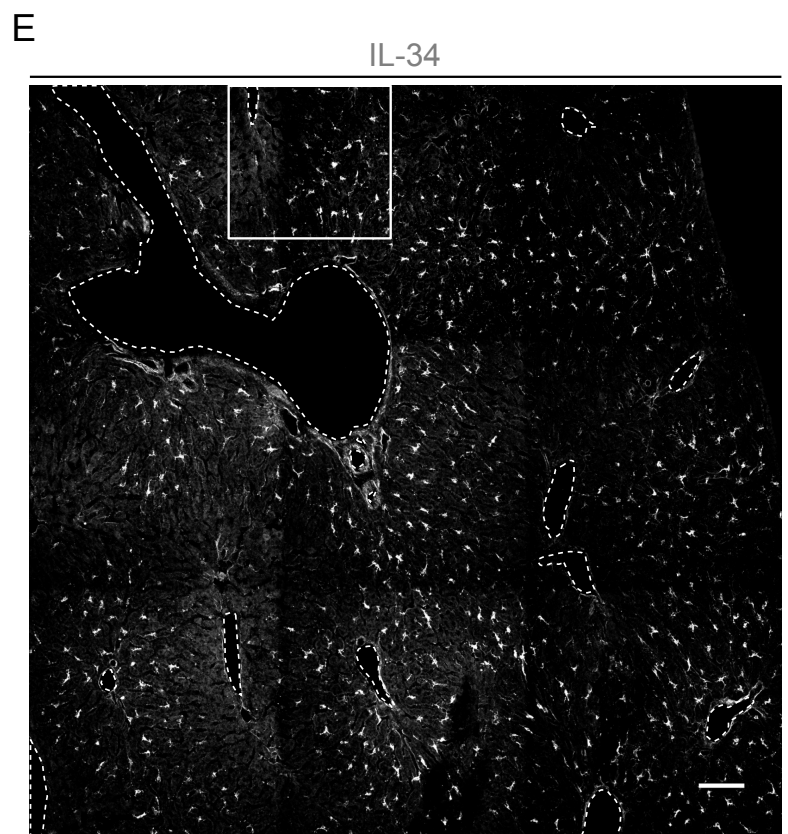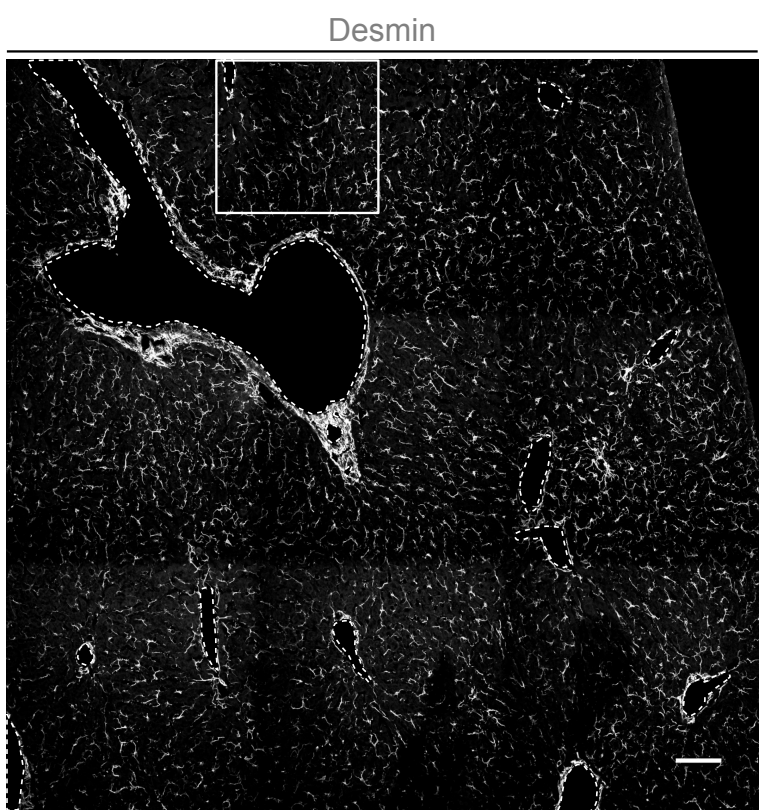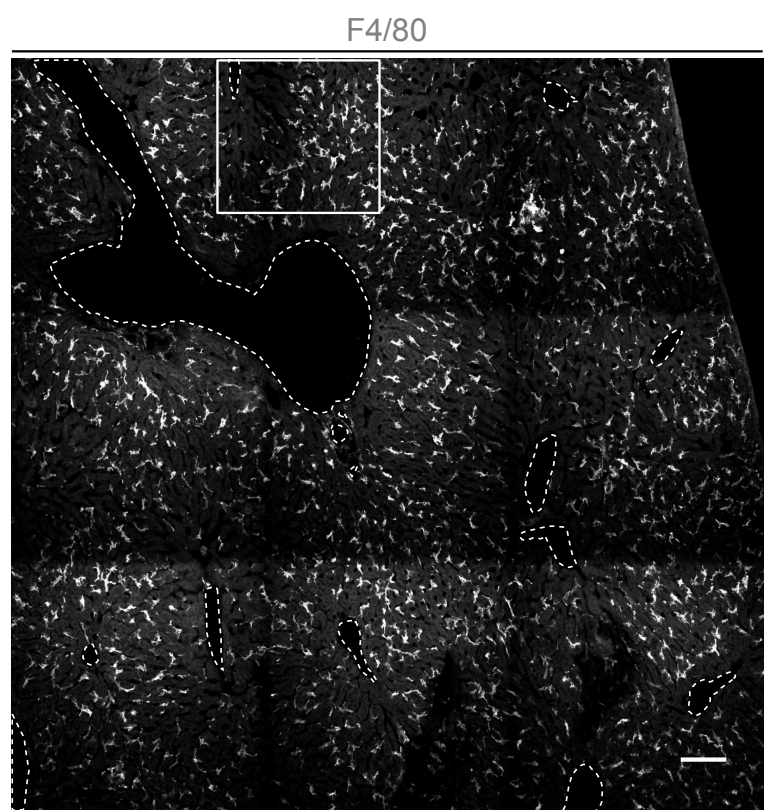

**Figure S6, Related to figure 7. HSCs and KCs survival factors crosstalk.**

(A) Relative RNA-sequencing expression of *Csf1* and *Il34* in HSCs, LSECs and hepatocytes at steady state or 12h and 36h after KC depletion.

(B) Quantification of the number of CSF1<sup>+</sup> cells/mm<sup>2</sup> in steady state mice or 8h and 16h after DT injection. Dots represent individual pictures. Results were normalized per mm<sup>2</sup> of tissue. Data are pooled from 2 experiments. n= 4. One way ANOVA with Bonferroni post-test. \*p<0.05; \*\*p<0.01; \*\*\*\*p<0.0001; ns = not significant.

(C) Relative micro-array expression of *Pdgfa*, *Pdgfb*, *Pdgfc* and *Pdgfd* in BM monocytes, KC or Mo-KCs at the indicated time points (days) following KC depletion.

(D) MIP of *Clec4f*<sup>DTR/+</sup> mouse liver sections stained for CSF1 (red), Desmin (green), CD31 (blue) and DAPI (gray) 8h after DT injection. Both HSCs (arrows) and LSECs (asterisks) showed CSF1 increased expression. Data are representative of 2 experiments. Scale bar = 20  $\mu$ m.

(E) MIP of a confocal composite dataset (3 by 3) of KC<sup>DTR/+</sup> mouse liver sections stained IL-34, Desmin, F4/80 and CD31 in PBS control mice. Data are representative of 2 experiments. Scale bar = 100  $\mu$ m.

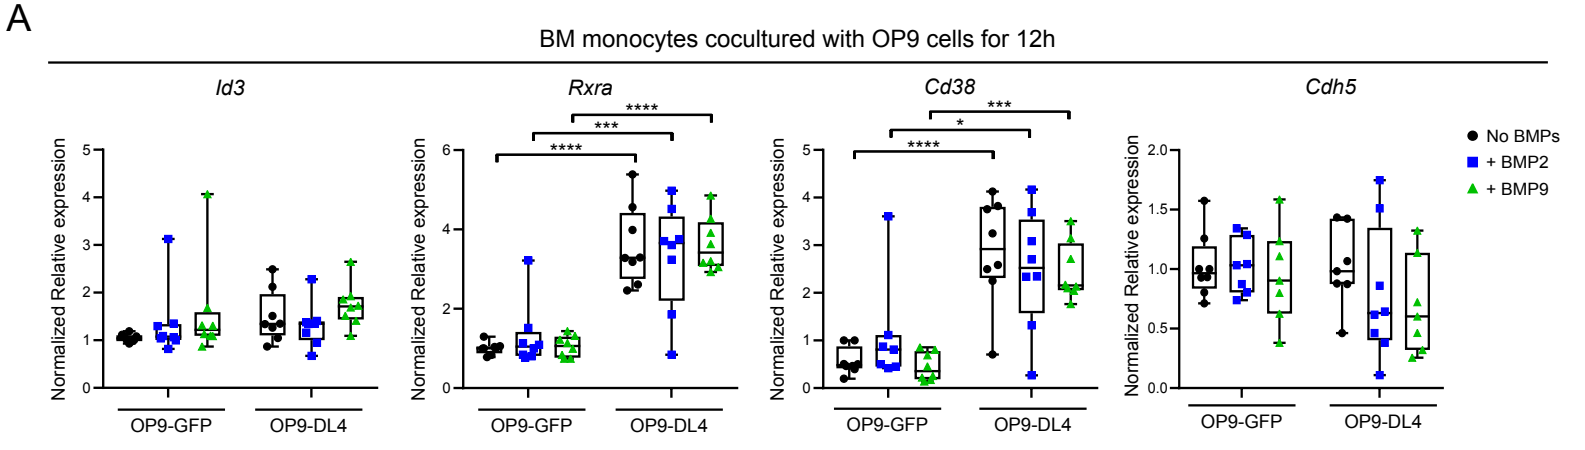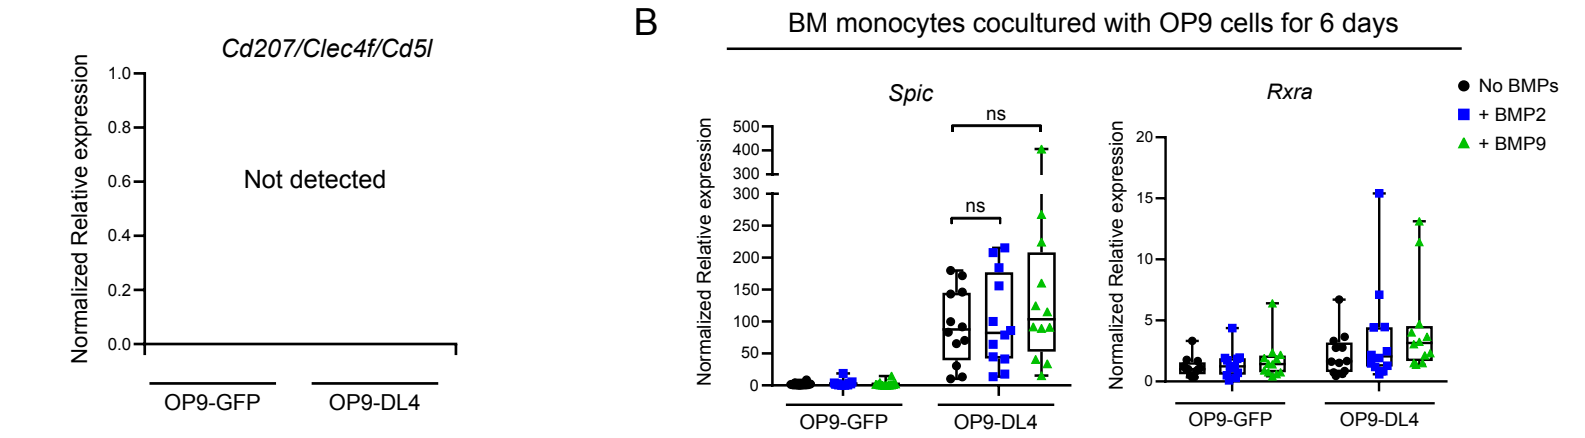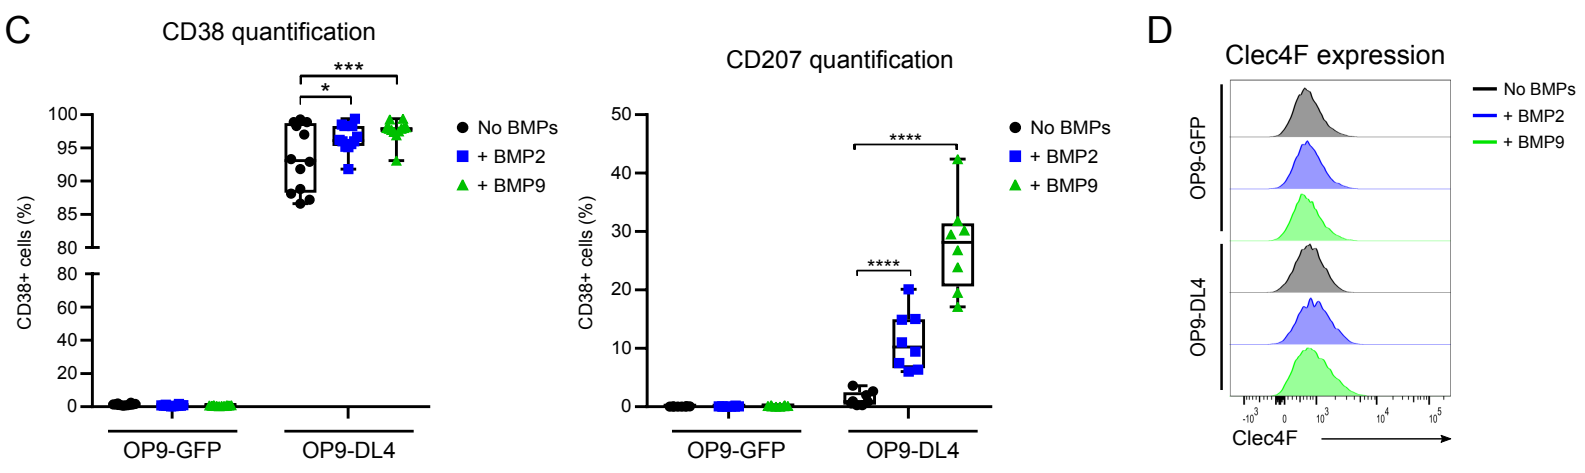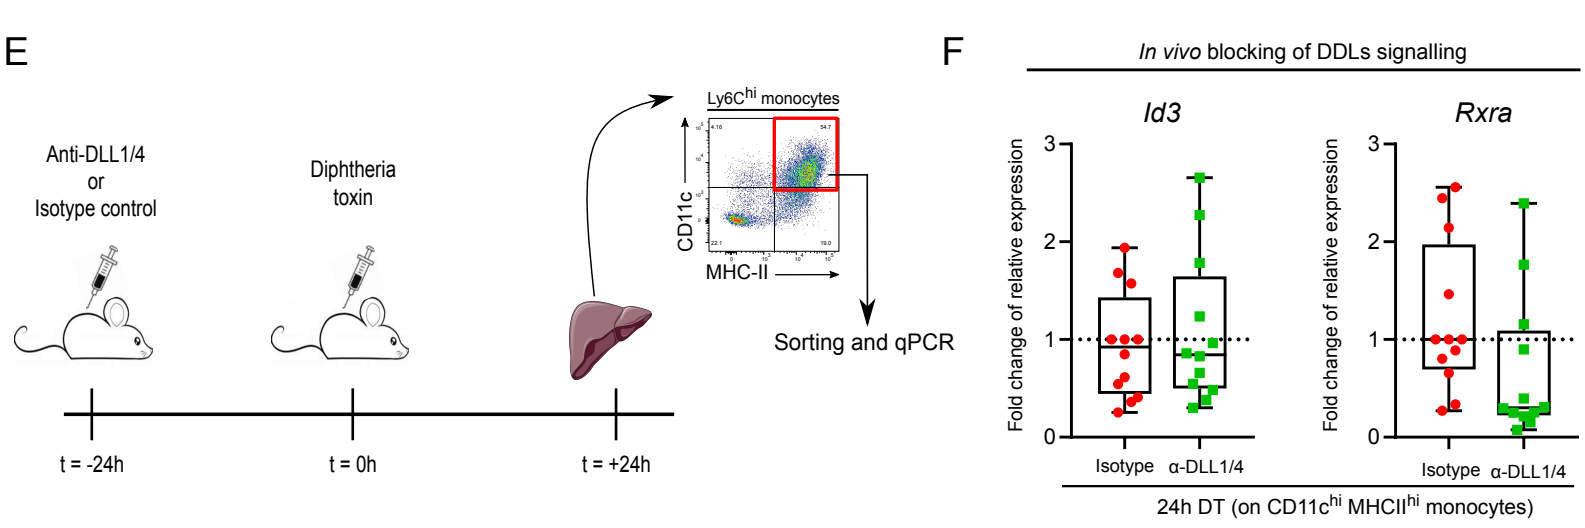

**Figure S7, Related to figure 7. Notch- and BMP-signaling induced KC identity.**

(A) Relative expression of KC-associated transcription factor mRNA (*Id3*, *Rxra*) or KC-core genes (*Clec4f*, *Cd207*, *Cd38*, *Cdh5*, *Cd5l*) normalized to *B2m* in BM monocytes cultured during 12 hours on a feeder layer of DLL4-expressing OP9 cells (OP9-DL4) or control OP9 cells (OP9-GFP) with or without either recombinant BMP2 or BMP9. Data are pooled from 2 experiments, n=8 per group. Two-way ANOVA with Tukey post-test. \*p<0.05, \*\*\*p<0.001, \*\*\*\*p<0.0001.

(B) Relative expression of *Spic* and *Rxra* normalized to *B2m* in BM monocytes cultured during 6 days on a feeder layer of OP9-DL4 cells or OP9-GFP cells with or without either recombinant BMP2 or BMP9. Data are pooled from 3 experiments, n=12 per group.

(C) Percentage of CD38 and CD207-expressing live CD45<sup>+</sup> cells. BM monocytes were cultured for 6 days on a feeder layer of OP9-DL4 cells or OP9-GFP cells with or without either recombinant BMP2 or BMP9. Data are pooled from 2-3 experiments, n=12 (CD38) or 8 (CD207). Two-way ANOVA with Tukey post-test. \*p<0.05, \*\*\*p<0.001, \*\*\*\*p<0.0001.

(D) Representative histograms of Clec4F expression by BM monocytes cultured 6 days on a feeder layer of DLL4-expressing OP9 cells (OP9-DL4) or control OP9 cells (OP9-GFP) with or without either recombinant BMP2 or BMP9. Data are representative of 2 experiments.

(E) Schematic representation of the DLLs blocking experiment. Anti-DLL1/4 or isotype control antibodies were injected 24h before DT injection. 24h after DT administration, CD11c<sup>hi</sup> MHCII<sup>hi</sup> monocytes were sorted and mRNA was extracted to quantify KC-associated transcription factors expression.

(F) Fold change of relative expression of *Id3* and *Rxra* in Cd11c<sup>hi</sup> MHCII<sup>hi</sup> monocytes 24h after DT injection from mice pretreated 24h before DT administration with either isotype antibodies or a combination of anti-DLL1 and DLL4 antibodies. n= 12 per group.
